# Supplementary material for: Kaempferol Improves Exercise Performance by Regulating Glucose Uptake, Mitochondrial Biogenesis, and Protein Synthesis via PI3K/AKT and MAPK Signaling Pathways
Source: MDPI journal article supplement (doi:10.3390/foods13071068), 2024-03-30
Supplement: s1 [file s1]

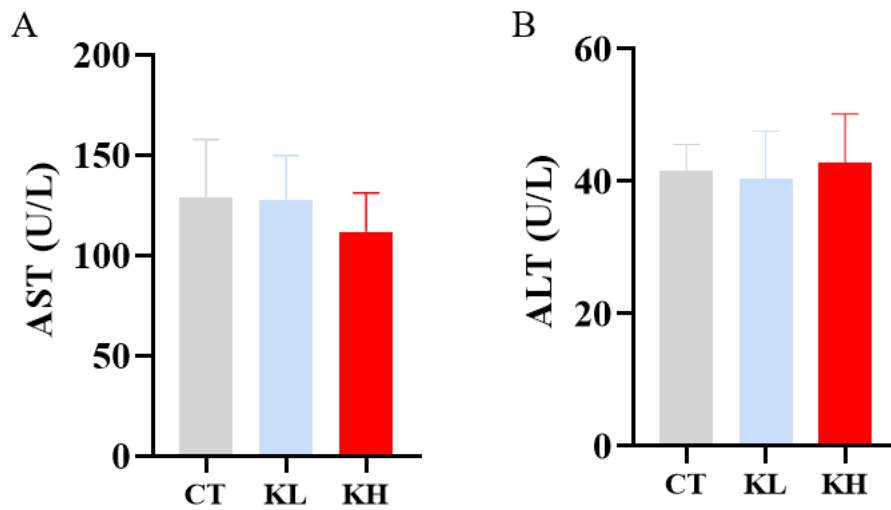

**Figure S1.** Effect of kaempferol on serum biochemical parameters in mice. Figure S1: Effect of kaempferol on serum biochemical parameters in mice. (A), aspartate aminotransferase (AST); (B), alanine aminotransferase (ALT); CT, Control group, 0.5% (wt./vol) sol-vent carboxymethyl cellulose sodium (CMC); KL, 25 mg/kg bw of kaempferol; KH, 100 mg/kg bw of kaempferol; bw, Body weight. \*,  $p < 0.05$ ; \*\*,  $p < 0.01$ .
